# Supplementary material for: Photobiomodulation therapy ameliorates hyperglycemia and insulin resistance by activating cytochrome c oxidase-mediated protein kinase B in muscle
Source: publisher site journal article supplement (doi:10.18632/aging.202760), 2021-03-26
Supplement: Supplementary file [file aging-v13i7-202760-supplementary-material-SD1.pdf]

**SUPPLEMENTARY FIGURES**

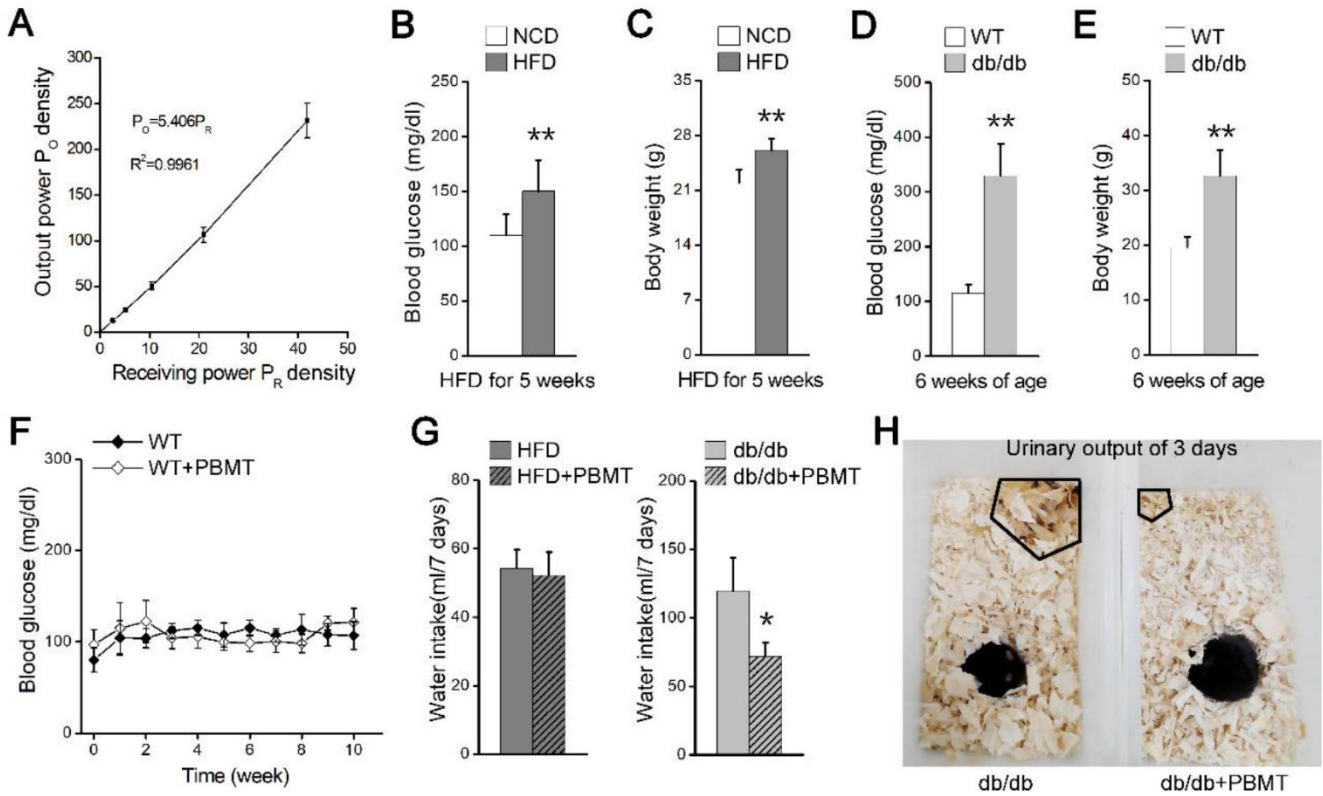

**Supplementary Figure 1. PBMT reduces blood glucose and insulin resistance in mouse models of type 2 diabetes.** (A) The correlation between output power density ( $P_o$ ) and receiving power density ( $P_r$ ) of Laser Diode (635 nm) passed through the fresh abdominal skin.  $n = 4$ . (B, C) Fasting blood glucose (B) and body weight (C) in mice fed a NCD ( $n = 12$ ) and HFD ( $n = 20$ ) for five weeks. Mean  $\pm$  SD.  $**p < 0.01$  vs. the NCD-fed mice (Student's  $t$ -test). (D, E) Fasting blood glucose (D) and body weight (E) in 6-week-old wild-type (WT) and db/db mice after a 12-hour fast. Mean  $\pm$  SD,  $n = 6$ .  $**p < 0.01$  vs. the WT mice (Student's  $t$ -test). (F) Fasting blood glucose curves of NCD-fed mice with or without PBMT for 10 weeks. Mean  $\pm$  SD,  $n = 5$ . (G) Water intake for seven days in HFD-fed and db/db mice treated with or without PBMT for 10 weeks. Mean  $\pm$  SD,  $n = 5$ .  $*p < 0.05$  vs. the PBMT-untreated mice (Student's  $t$ -test). (H) Representative images of urinary output were obtained in db/db mice treated with or without PBMT for 10 weeks.

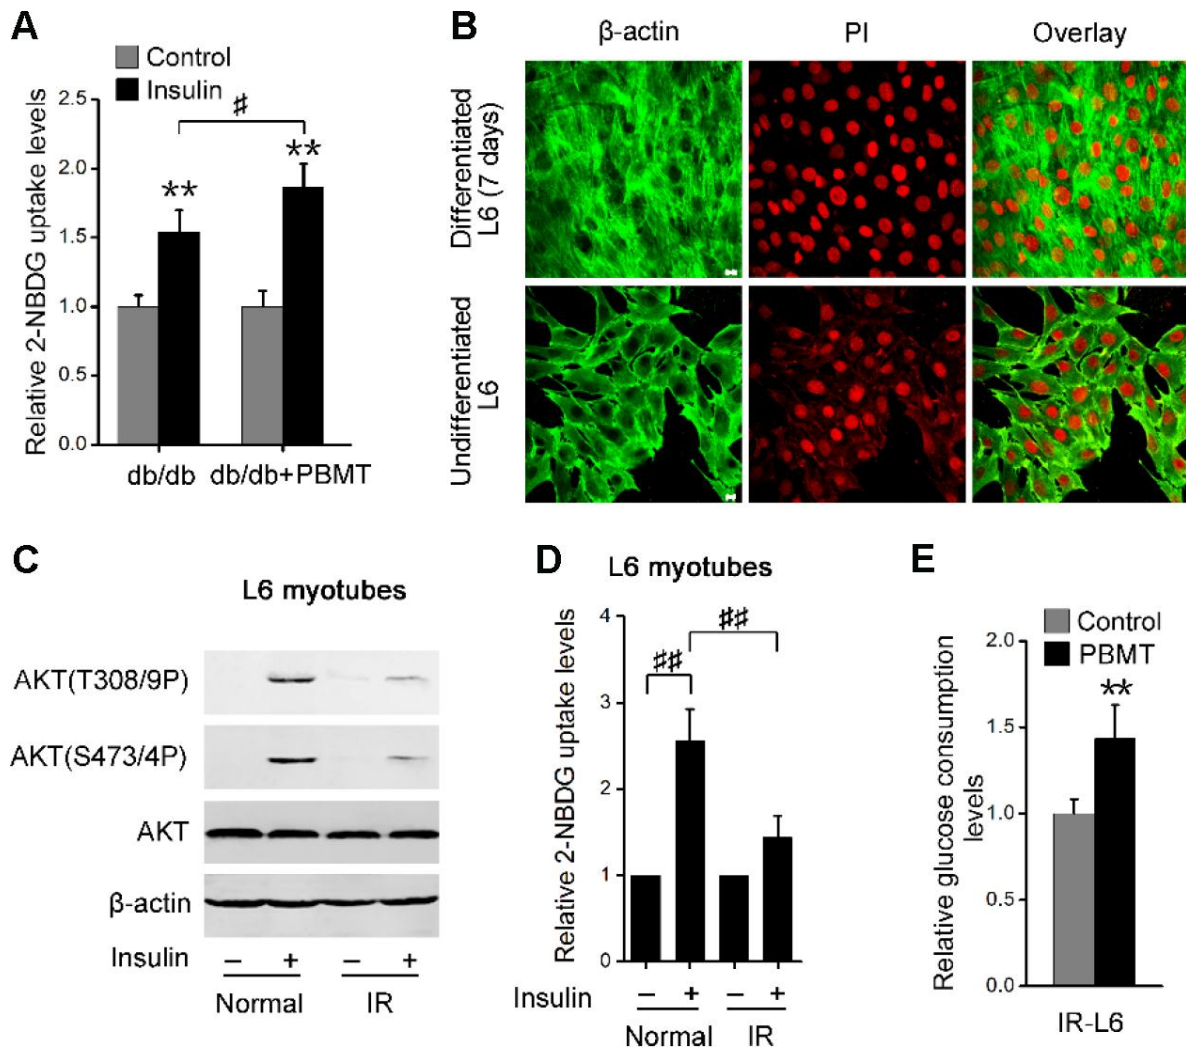

**Supplementary Figure 2. PBMT ameliorates metabolic disorders of skeletal muscle in mouse models of type 2 diabetes.** (A) 2-NBDG uptake in insulin-stimulated GM from db/db mice with or without PBMT for 10 weeks. Mean  $\pm$  SD,  $n = 4$ . \*\* $p < 0.01$  vs. the control group; # $p < 0.05$  vs. the indicated group (Student's  $t$ -test). (B) Representative immunofluorescence images of L6 myoblasts differentiation. Cell nuclei (red) were stained with propidium iodide (PI).  $\beta$ -actin (green) was stained with anti- $\beta$ -actin antibody. Scale bar, 10  $\mu$ m. (C) Immunoblot analysis of AKT phosphorylation in L6 myotubes. IR, insulin resistance. (D) 2-NBDG uptake analysis in L6 myotubes. Mean  $\pm$  SD,  $n = 4$ . ## $p < 0.01$  vs. the indicated group (Student's  $t$ -test). (E) Glucose consumption in conditioned medium from IR-L6 myotubes after PBMT. Mean  $\pm$  SD,  $n = 4$ . \*\* $p < 0.01$  vs. the control group (Student's  $t$ -test).

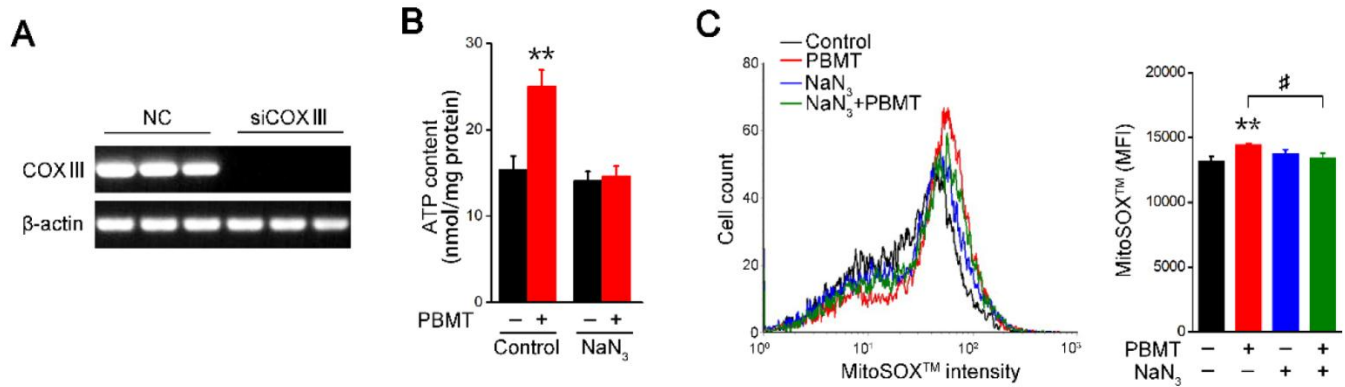

**Supplementary Figure 3. PBMT increases ATP and ROS generation by increasing activity of mitochondrial CcO.** (A) PCR analysis of *COXIII* mRNA in IR-L6 myotubes transfected with NC or COXIII siRNA. (B) Intracellular ATP content in IR-L6 myotubes 15 min after PBMT. Cells were pre-cultured with NaN<sub>3</sub> (1 mM) 1 h before PBMT. Mean ± SD, n = 4. \*\**p* < 0.01 vs. the PBMT-untreated group (Student's *t*-test). (C) FACS analysis of mitochondrial O<sub>2</sub><sup>-</sup> generation in IR-L6 myotubes 15 min after PBMT. Cells were pre-cultured with NaN<sub>3</sub> (1 mM) 1 h before PBMT. Mean ± SD, n = 3. \*\**p* < 0.01 vs. the control group; #*p* < 0.05 vs. the indicated group (Student's *t*-test).
